# Supplementary material for: Framework for personalized prediction of treatment response in relapsing remitting multiple sclerosis
Source: PubMed Central journal article supplement (PMC7006411; doi:10.1186/s12874-020-0906-6), 2020-02-07
Supplement: 12874_2020_906_MOESM1_ESM.pdf [file 12874_2020_906_MOESM1_ESM.pdf]

## Additional file 1: Inclusion criteria and resulting patient population

Descriptive statistics about the patient population can be found in **Table S1.2** and **Table S1.3**. Both tables look at patient data at two stages of the data filtering process. More specifically, they provide numbers about the data (i) before the last 14 filtering criteria have been applied, and (ii) after it has been fully filtered. For a list of all filtering criteria see **Table S1.1**.

First, consider the patient data that results from the application of all filters, i.e. the data that our model estimates are based on. Among the most interesting statistics that describe it, note that the median number of relapses on index therapy is 0, which means that a majority of patients do not suffer a relapse in this therapy cycle. Also, in 16% of the cases a CDP is observed after the start of the index therapy. For what regards the predictors' distribution, one observes that two thirds of the patient population is aged between 30 and 50, that almost half of the patients have an EDSS lower than 1.5, and that 75% of them are females. Also, note that among all possible index therapy types we retained only six, namely Dimethylfumarat (22%), Fingolimod (25%), Glatirameracetat (13%), IF-beta1 (19%), Natalizumab (8%), and Teriflunomide (13%). This way, predictions can be based on at least 266 therapy cycles per DMT. Further details can be found in **Table S1.2** and **Table S1.3**.

**Figure S1.1** displays boxplots for the time (in years) that elapsed between the MS diagnosis and the start of the index therapy, both marginally and given a certain variable (e.g. per age category, per therapy type, etc.). **Figure S1.2** displays the same kind of boxplots for the duration (in years) of the current therapy.

As can be seen in **Table S1.3**, application of the inclusion criteria in the filtering process (**Table S1.1**) leaves the characteristics of the underlying patient population globally unchanged. There are, however, a few exceptions to this. The graphs in **Figure S1.3** illustrate some of these changes.

**Table S1.4** provides an overview over the number of patients per clinical site after application of the inclusion criteria. Overall our dataset contains patient data from 67 clinical sites, ranging from large (n=247) to very small sites (n=3).

**Table S1.1:** Quality and inclusion criteria overview

| Description                                                      | ID | Therapies |        |
|------------------------------------------------------------------|----|-----------|--------|
|                                                                  |    | Loss      | Total  |
| Original entries                                                 | 1  |           | 102337 |
| Removing duplicates                                              | 2  | -1758     | 100579 |
| Removing cycles used in clinical studies                         | 3  | -1566     | 99013  |
| Missing diagnosis Date                                           | 4  | -391      | 98622  |
| Missing date of Birth                                            | 5  | 0         | 98622  |
| Recorded date (e.g. birth date) after data delivery date         | 6  | -53       | 98569  |
| Date Of birth before 1916                                        | 7  | 0         | 98569  |
| Recorded date (e.g. start of therapy cycle) before date of birth | 8  | -803      | 97766  |
| Remove patients that have a therapy with missing start Date      | 9  | -79       | 97687  |
| Remove patients with therapy end date before start date          | 10 | -462      | 97225  |
| Remove therapies corresponding to patients with no EDSS visits   | 11 | -7900     | 89325  |

|                                                                                |    |        |       |
|--------------------------------------------------------------------------------|----|--------|-------|
| Remove therapies with start date after last visit                              | 12 | -2218  | 87107 |
| Therapies that were stopped within a day (duration = 0 days)                   | 13 | -153   | 86954 |
| Insert therapy cycle "NoDMT" to patients where no therapies are recorded       | 14 | 989    | 87943 |
| Merge therapies with the same start date                                       | 15 | -8080  | 79863 |
| Add missing end dates                                                          | 16 | -193   | 79670 |
| Remove total overlap with NoDMT                                                | 17 | -25256 | 54414 |
| Merge overlapping equal therapies                                              | 18 | -587   | 53827 |
| Merge overlapping different therapies (therapy name changes to "Other DMT")    | 19 | -1921  | 51906 |
| Add NoDMT cycles into gaps where no therapy was recorded                       | 20 | 20963  | 72869 |
| Remove NoDMT cycles after DMT with duration less than 92 days (wash out phase) | 21 | -5823  | 67046 |
| Merge subsequent therapies and fill therapy gaps of duration less than 92 days | 22 | -24346 | 42700 |
| Locking away test set <sup>1)</sup>                                            | 23 | -2140  | 40560 |
| Filter: Not RRMS                                                               | 24 | -6446  | 34114 |
| Filter: Therapy cycle started before 2009-01-01                                | 25 | -13386 | 20728 |
| Filter: Therapy cycle started when patient was under 18                        | 26 | -278   | 20450 |
| Filter: Index therapy is NoDMT                                                 | 27 | -7988  | 12462 |
| Filter: EDSS at start of therapy cycle > 6                                     | 28 | -124   | 12338 |
| Filter: Observed ARR is > 12                                                   | 29 | -26    | 12312 |
| Filter: First therapy cycle                                                    | 30 | -321   | 11991 |
| Filter: Therapy cycle that started within 6 months after diagnosis             | 31 | -2578  | 9413  |
| Filter: Index therapy is OtherDMT                                              | 32 | -24    | 9389  |
| Filter: Missing EDSS measurement                                               | 33 | -3754  | 5635  |
| Filter: Response could not be computed                                         | 34 | 0      | 5635  |
| Filter: Cycles without previous relapse                                        | 35 | -1281  | 4354  |
| Filter: Too few observations (visits) for this therapy                         | 36 | -327   | 4027  |
| Filter: Current Therapy is OtherDMT                                            | 37 | -47    | 3980  |
| Filter: More than one therapy cycle per patient (randomly sample one cycle)    | 38 | -857   | 3123  |
| Filter: Clinical sites where only one patient is left                          | 39 | -4     | 3119  |

Overview of quality and inclusion criteria, where the steps in the first half of the table represent data cleaning (quality), and in the second half represent filtering (inclusion).

<sup>1)</sup> Note that work on this project started with a database extraction in March 2016. At that time the initial test set (10% of all therapy cycles) was randomly selected after applying all filters. Since 2017 the approach has been different: 10% of all newly available therapy cycles with each updated database extraction are now randomly sampled before applying the inclusion criteria. As the previous sampling of the test set remains unchanged, the loss at this step therefore appears to be less than 10%. However, after the remaining filters are applied to the test set, it contains 314 therapy cycles, which approximately represents 10% of the training set size (n = 3119).

**Table S1.2:** Responses overview

| Response                   | Summary            | Before filtering (n=20728) | After filtering (n=3119) |
|----------------------------|--------------------|----------------------------|--------------------------|
| Number of relapses (count) | Min                | 0                          | 0                        |
|                            | 1st quartile       | 0                          | 0                        |
|                            | Median             | 0                          | 0                        |
|                            | Mean               | 0.54                       | 0.43                     |
|                            | 3rd quartile       | 1                          | 1                        |
|                            | Max                | 14                         | 7                        |
|                            | Standard deviation | 0.95                       | 0.88                     |
| CDP (binary)               | Mean               | 0.11                       | 0.16                     |

Summarized responses' distributions before and after application of the inclusion criteria.

**Table S1.3:** Predictors overview

| Predictor                         | Summary            | Before filtering (n=20728) | After filtering (n=3119) |
|-----------------------------------|--------------------|----------------------------|--------------------------|
| Duration of index therapy (yrs)   | Min                | 0.00                       | 0.08                     |
|                                   | 1st quartile       | 0.36                       | 0.77                     |
|                                   | Median             | 1.19                       | 1.92                     |
|                                   | Mean               | 1.90                       | 2.38                     |
|                                   | 3rd quartile       | 2.88                       | 3.60                     |
|                                   | Max                | 9.43                       | 9.39                     |
|                                   | Standard deviation | 1.96                       | 1.95                     |
| Duration of current therapy (yrs) | Min                | 0.00                       | 0.02                     |
|                                   | 1st quartile       | 0.02                       | 0.84                     |
|                                   | Median             | 0.61                       | 2.07                     |
|                                   | Mean               | 2.23                       | 3.85                     |
|                                   | 3rd quartile       | 2.58                       | 5.04                     |
|                                   | Max                | 38.41                      | 35.36                    |
|                                   | Standard deviation | 3.91                       | 4.65                     |
| Relapses count                    | Min                | 0                          | 0                        |
|                                   | 1st quartile       | 0                          | 0                        |
|                                   | Median             | 0                          | 0                        |
|                                   | Mean               | 0.56                       | 0.64                     |
|                                   | 3rd quartile       | 1                          | 1                        |
|                                   | Max                | 6                          | 6                        |
|                                   | Standard deviation | 0.76                       | 0.76                     |
| Diagnosis distance (yrs)          | Min                | 0.00                       | 0.10                     |
|                                   | 1st quartile       | 0.02                       | 2.81                     |
|                                   | Median             | 2.24                       | 6.38                     |
|                                   | Mean               | 5.05                       | 8.14                     |
|                                   | 3rd quartile       | 8.30                       | 11.84                    |
|                                   | Max                | 52.60                      | 47.18                    |
|                                   | Standard deviation | 6.47                       | 6.69                     |
| Age                               | (0,18]             | 1%                         | -                        |
|                                   | (18,30]            | 27%                        | 19%                      |
|                                   | (30,40]            | 31%                        | 31%                      |
|                                   | (40,50]            | 27%                        | 33%                      |
|                                   | 50+                | 14%                        | 17%                      |
| EDSS                              | (0,1.5]            | 49%                        | 47%                      |
|                                   | (1.5,2.5]          | 23%                        | 24%                      |
|                                   | (2.5,3.5]          | 12%                        | 14%                      |
|                                   | (3.5,10]           | 16%                        | 15%                      |
| Current therapy                   | NoDMT              | 51%                        | 51%                      |
|                                   | Alemtuzumab        | 0%                         | -                        |
|                                   | Azathioprin        | 0%                         | -                        |
|                                   | Cladribin          | 0%                         | -                        |
|                                   | Cyclophosphamid    | 0%                         | -                        |
|                                   | Daclizumab         | 1%                         | -                        |
|                                   | Dimethylfumarat    | 4%                         | 3%                       |
|                                   | Fingolimod         | 4%                         | 2%                       |

|                               |                  |     |     |
|-------------------------------|------------------|-----|-----|
|                               | Glatirameracetat | 10% | 12% |
|                               | IF-beta1         | 22% | 26% |
|                               | Immunglobine     | 0%  | -   |
|                               | Laquinimod       | 0%  | -   |
|                               | Methotrexat      | 0%  | -   |
|                               | Mitoxantron      | 0%  | -   |
|                               | Natalizumab      | 4%  | 4%  |
|                               | Ocrelizumab      | 0%  | -   |
|                               | OtherDMT         | 0%  | -   |
|                               | Rituximab        | 0%  | -   |
|                               | Siponimod        | 0%  | -   |
|                               | Teriflunomide    | 2%  | 2%  |
| Index therapy                 | NoDMT            | 39% | -   |
|                               | Alemtuzumab      | 1%  | -   |
|                               | Azathioprin      | 0%  | -   |
|                               | Cladribin        | 0%  | -   |
|                               | Cyclophosphamid  | 0%  | -   |
|                               | Daclizumab       | 1%  | -   |
|                               | Dimethylfumarat  | 9%  | 22% |
|                               | Fingolimod       | 9%  | 25% |
|                               | Glatirameracetat | 10% | 13% |
|                               | IF-beta1         | 20% | 19% |
|                               | Immunglobine     | 0%  | -   |
|                               | Laquinimod       | 0%  | -   |
|                               | Methotrexat      | 0%  | -   |
|                               | Mitoxantron      | 0%  | -   |
|                               | Natalizumab      | 4%  | 9%  |
|                               | Ocrelizumab      | 0%  | -   |
|                               | OtherDMT         | 0%  | -   |
|                               | Rituximab        | 0%  | -   |
|                               | Siponimod        | 0%  | -   |
|                               | Teriflunomide    | 5%  | 13% |
| Gender                        | F                | 74% | 75% |
|                               | M                | 26% | 25% |
| Second-line therapy indicator | FALSE            | 90% | 88% |
|                               | TRUE             | 10% | 12% |
| DMTs count                    | 0                | 51% | 23% |
|                               | 1                | 27% | 49% |
|                               | 2                | 13% | 18% |
|                               | 3+               | 9%  | 10% |
| Relapse distance              | [0, 0.25)        | 47% | 17% |
|                               | [0.25,1)         | 17% | 32% |
|                               | [1, 3)           | 15% | 17% |
|                               | [3, Inf)         | 21% | 24% |

---

Summarized predictors' distributions before and after application of the inclusion criteria. Note that the duration of the index therapy is included as an offset into the models to account for varying therapy cycle durations.

**Table S1.4:** Clinical sites overview

| ID         | Frequency | ID         | Frequency | ID         | Frequency |
|------------|-----------|------------|-----------|------------|-----------|
| Site ID 1  | 247       | Site ID 24 | 54        | Site ID 47 | 17        |
| Site ID 2  | 211       | Site ID 25 | 51        | Site ID 48 | 16        |
| Site ID 3  | 143       | Site ID 26 | 50        | Site ID 49 | 14        |
| Site ID 4  | 137       | Site ID 27 | 49        | Site ID 50 | 12        |
| Site ID 5  | 131       | Site ID 28 | 46        | Site ID 51 | 11        |
| Site ID 6  | 121       | Site ID 29 | 45        | Site ID 52 | 11        |
| Site ID 7  | 94        | Site ID 30 | 43        | Site ID 53 | 11        |
| Site ID 8  | 90        | Site ID 31 | 42        | Site ID 54 | 10        |
| Site ID 9  | 83        | Site ID 32 | 40        | Site ID 55 | 10        |
| Site ID 10 | 81        | Site ID 33 | 38        | Site ID 56 | 10        |
| Site ID 11 | 80        | Site ID 34 | 35        | Site ID 57 | 9         |
| Site ID 12 | 77        | Site ID 35 | 34        | Site ID 58 | 6         |
| Site ID 13 | 71        | Site ID 36 | 31        | Site ID 59 | 5         |
| Site ID 14 | 70        | Site ID 37 | 28        | Site ID 60 | 5         |
| Site ID 15 | 69        | Site ID 38 | 24        | Site ID 61 | 5         |
| Site ID 16 | 65        | Site ID 39 | 22        | Site ID 62 | 5         |
| Site ID 17 | 62        | Site ID 40 | 22        | Site ID 63 | 4         |
| Site ID 18 | 61        | Site ID 41 | 21        | Site ID 64 | 4         |
| Site ID 19 | 60        | Site ID 42 | 20        | Site ID 65 | 3         |
| Site ID 20 | 57        | Site ID 43 | 19        | Site ID 66 | 3         |
| Site ID 21 | 57        | Site ID 44 | 19        | Site ID 67 | 3         |
| Site ID 22 | 54        | Site ID 45 | 19        |            |           |
| Site ID 23 | 54        | Site ID 46 | 18        |            |           |

Frequency of patients in clinical sites after application of the inclusion criteria.

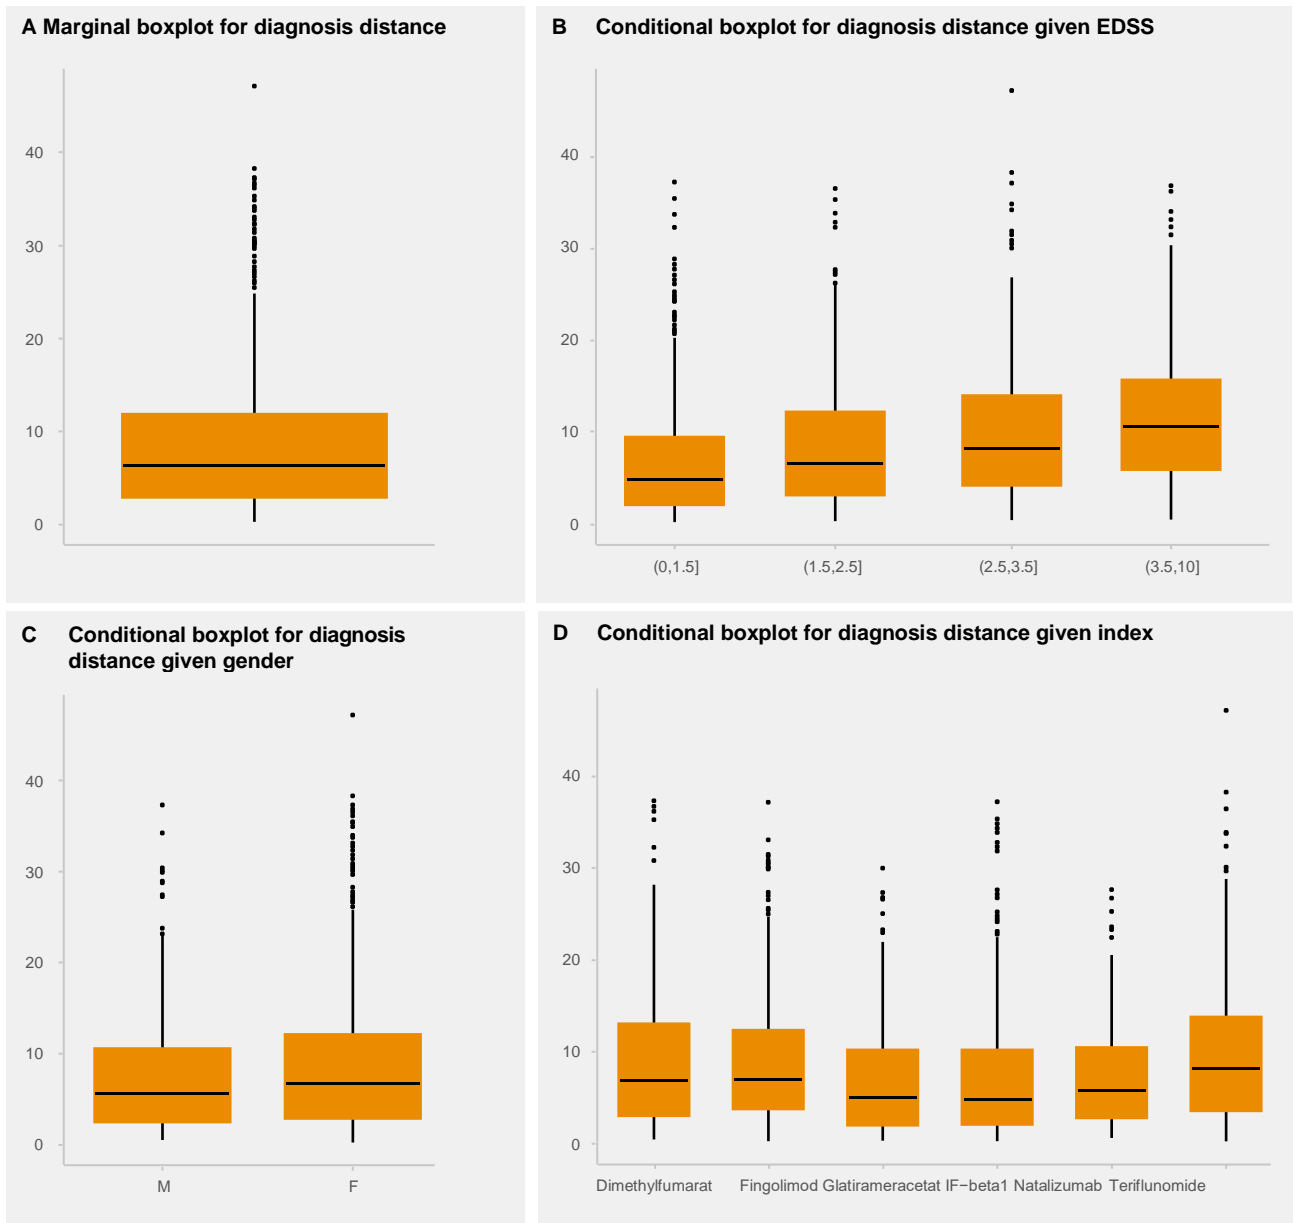

**Figure S1.1:** Boxplot summarizing the distribution of the time (in years) that elapsed between the date of the MS diagnosis and the start of the index therapy, marginally (A) or given the EDSS score (B), the gender (C) or the index therapy type (D).

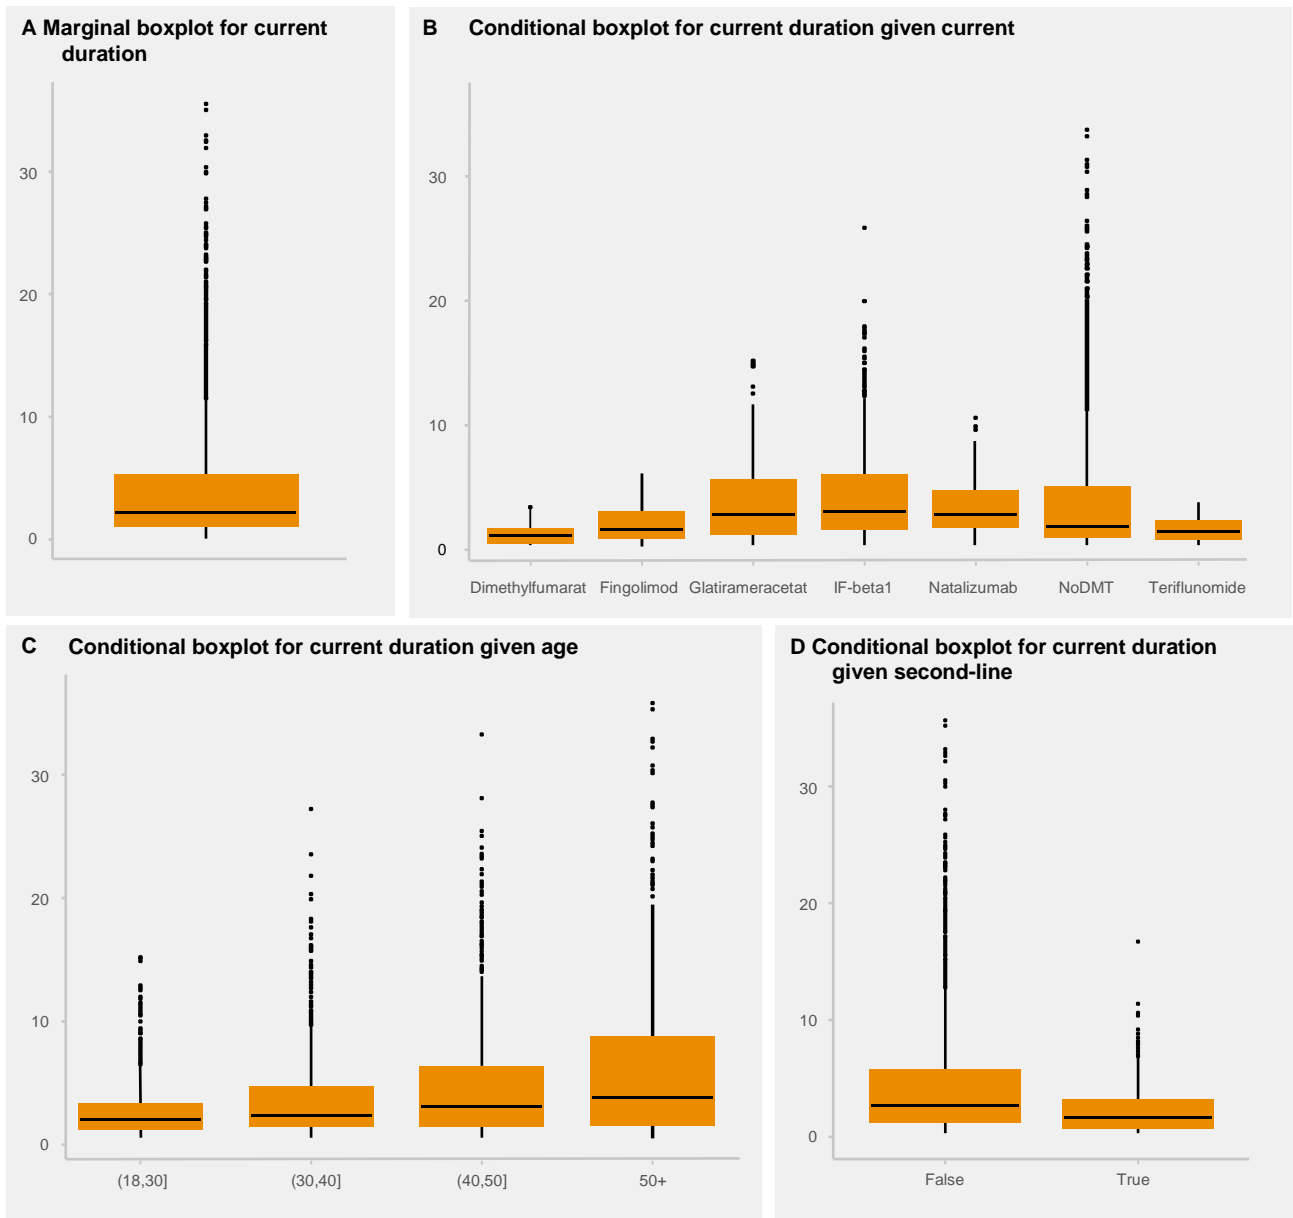

**Figure S1.2:** Boxplot summarizing the distribution of the duration (in years) of the current therapy, marginally (A) or given the current therapy type (B), the age (C) or the indicator as to whether a second-line DMT has been taken in the past (D).

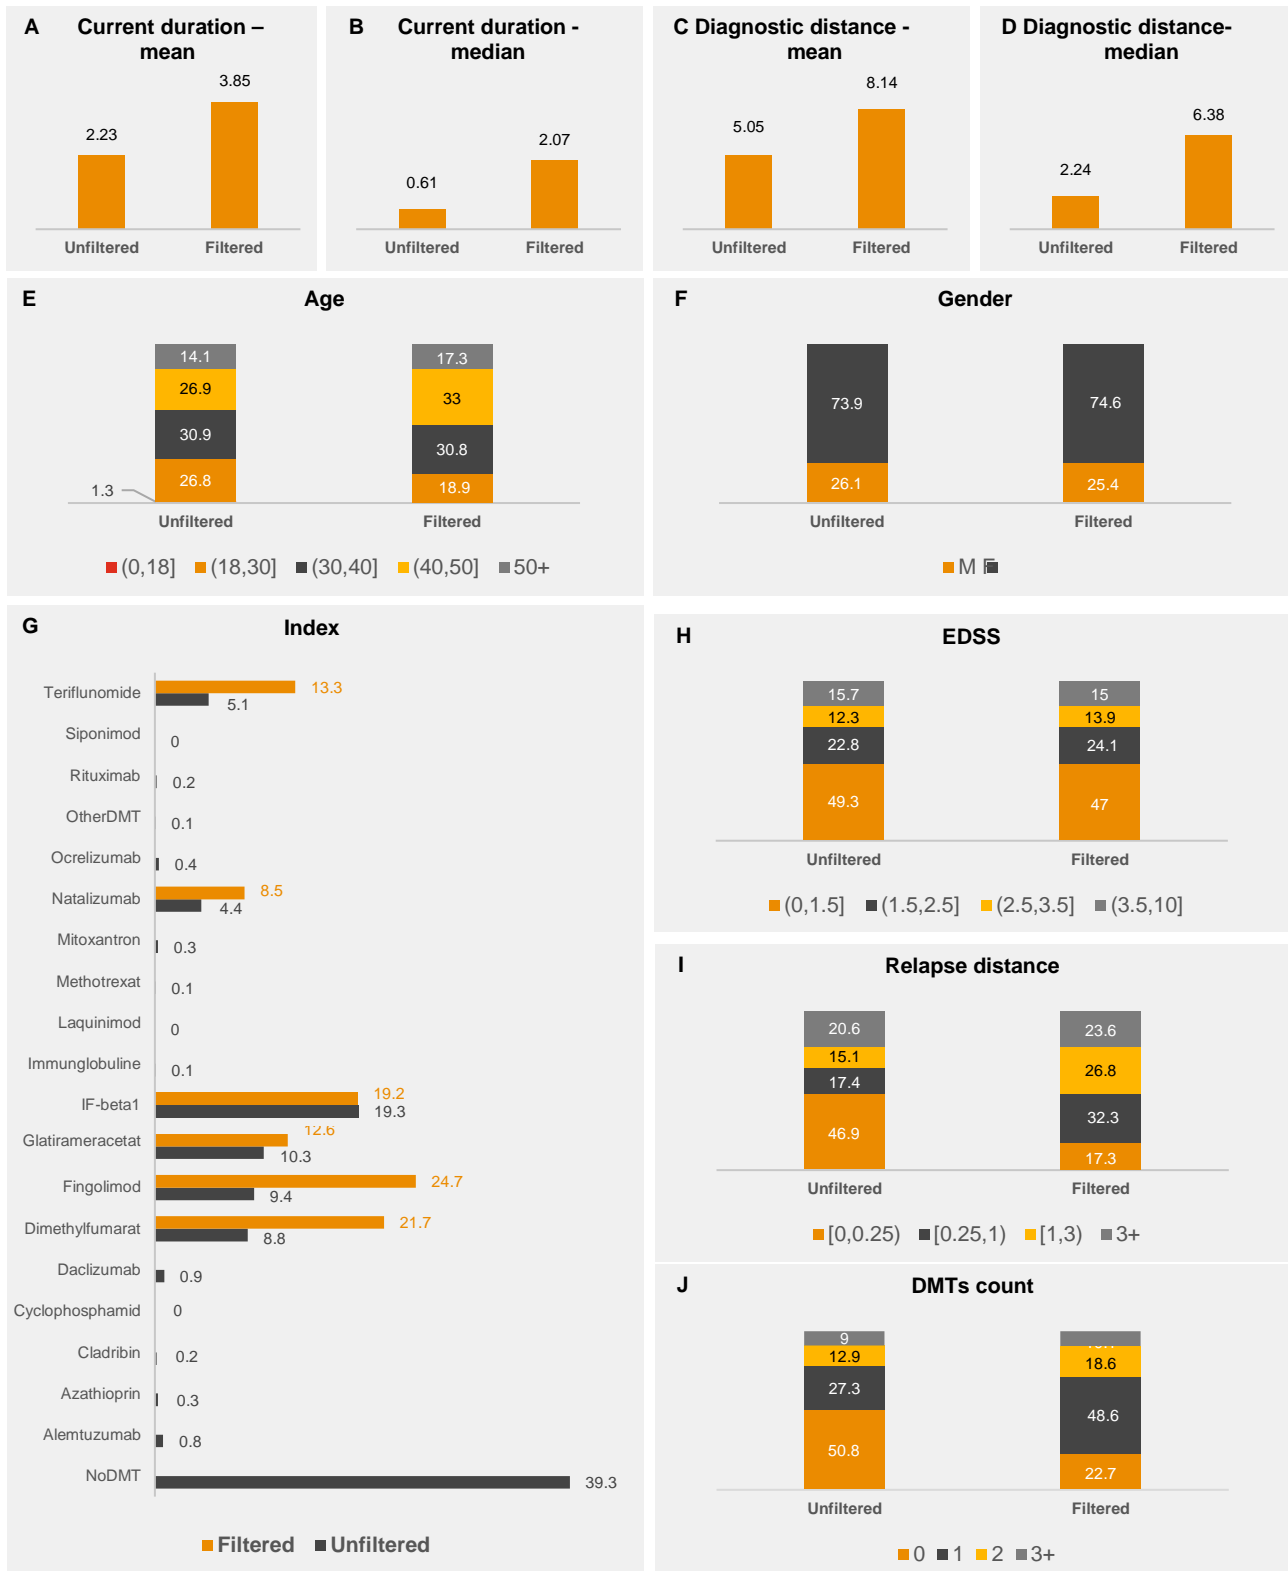

**Figure S1.3:** Behavior of a selection of predictors under filtering. Are inspected: the duration of the current therapy (A-B), the diagnosis distance (C-D), the patient's age (E), the patient's gender (F), the index therapy type (G), the EDSS (H), the relapse distance (I), and the DMTs count (J). In particular, after application of the inclusion criteria, the following changes were observed: the mean duration of current therapy increases (A); the average diagnosis distance increases (C); most often shorter than three months before filtering, the relapse distance most often lies between three months and one year after filtering (I); the number of patients having undergone exactly one DMT becomes a majority (J). No additional significant changes were observed.
