# Supplementary material for: Framework for personalized prediction of treatment response in relapsing remitting multiple sclerosis
Source: PubMed Central journal article supplement (PMC7006411; doi:10.1186/s12874-020-0906-6), 2020-02-07
Supplement: 12874_2020_906_MOESM4_ESM.pdf [file 12874_2020_906_MOESM4_ESM.pdf]

## Additional file 4: Performance by observation time window

**Table S4.1: Performance by observation time window.**

| Sample        | n      | Value       | Measure                 | Response | Observation time (yrs) |
|---------------|--------|-------------|-------------------------|----------|------------------------|
| out-of-sample | 18037  | 0.725730443 | C-Index                 | CDP      | (0,0.5]                |
| out-of-sample | 98518  | 0.603605433 | C-Index                 | CDP      | (0.5,1.5]              |
| out-of-sample | 67977  | 0.591266164 | C-Index                 | CDP      | (1.5,2.5]              |
| out-of-sample | 62006  | 0.526626456 | C-Index                 | CDP      | (2.5,3.5]              |
| out-of-sample | 42715  | 0.566885169 | C-Index                 | CDP      | (3.5,4.5]              |
| out-of-sample | 9527   | 0.585913719 | C-Index                 | CDP      | (4.5,5.5]              |
| out-of-sample | 9004   | 0.58251888  | C-Index                 | CDP      | (5.5,Inf]              |
| out-of-sample | 58563  | 0.745009648 | C-Index                 | Relapse  | (0,0.5]                |
| out-of-sample | 185104 | 0.630486105 | C-Index                 | Relapse  | (0.5,1.5]              |
| out-of-sample | 102662 | 0.656304183 | C-Index                 | Relapse  | (1.5,2.5]              |
| out-of-sample | 85546  | 0.629129357 | C-Index                 | Relapse  | (2.5,3.5]              |
| out-of-sample | 53584  | 0.621668782 | C-Index                 | Relapse  | (3.5,4.5]              |
| out-of-sample | 10990  | 0.555277525 | C-Index                 | Relapse  | (4.5,5.5]              |
| out-of-sample | 9275   | 0.623234501 | C-Index                 | Relapse  | (5.5,Inf]              |
| out-of-sample | 555    | 0.022519098 | MSE                     | CDP      | (0,0.5]                |
| out-of-sample | 769    | 0.089770155 | MSE                     | CDP      | (0.5,1.5]              |
| out-of-sample | 532    | 0.126785811 | MSE                     | CDP      | (1.5,2.5]              |
| out-of-sample | 431    | 0.170392868 | MSE                     | CDP      | (2.5,3.5]              |
| out-of-sample | 406    | 0.176183778 | MSE                     | CDP      | (3.5,4.5]              |
| out-of-sample | 167    | 0.203516824 | MSE                     | CDP      | (4.5,5.5]              |
| out-of-sample | 259    | 0.234945142 | MSE                     | CDP      | (5.5,Inf]              |
| out-of-sample | 555    | 0.096080014 | MSE                     | Relapse  | (0,0.5]                |
| out-of-sample | 769    | 0.462789086 | MSE                     | Relapse  | (0.5,1.5]              |
| out-of-sample | 532    | 0.751013541 | MSE                     | Relapse  | (1.5,2.5]              |
| out-of-sample | 431    | 0.856222137 | MSE                     | Relapse  | (2.5,3.5]              |
| out-of-sample | 406    | 0.986274177 | MSE                     | Relapse  | (3.5,4.5]              |
| out-of-sample | 167    | 1.547045736 | MSE                     | Relapse  | (4.5,5.5]              |
| out-of-sample | 259    | 1.988639802 | MSE                     | Relapse  | (5.5,Inf]              |
| out-of-sample | 555    | 56.86443123 | Negative log-likelihood | CDP      | (0,0.5]                |
| out-of-sample | 769    | 251.7976131 | Negative log-likelihood | CDP      | (0.5,1.5]              |
| out-of-sample | 532    | 220.8054915 | Negative log-likelihood | CDP      | (1.5,2.5]              |
| out-of-sample | 431    | 229.2835966 | Negative log-likelihood | CDP      | (2.5,3.5]              |
| out-of-sample | 406    | 216.6877741 | Negative log-likelihood | CDP      | (3.5,4.5]              |
| out-of-sample | 167    | 99.7876417  | Negative log-likelihood | CDP      | (4.5,5.5]              |
| out-of-sample | 259    | 171.8032924 | Negative log-likelihood | CDP      | (5.5,Inf]              |
| out-of-sample | 555    | 173.0040932 | Negative log-likelihood | Relapse  | (0,0.5]                |
| out-of-sample | 769    | 580.7701446 | Negative log-likelihood | Relapse  | (0.5,1.5]              |

|               |     |             |                         |         |           |
|---------------|-----|-------------|-------------------------|---------|-----------|
| out-of-sample | 532 | 465.7815193 | Negative log-likelihood | Relapse | (1.5,2.5] |
| out-of-sample | 431 | 420.5025399 | Negative log-likelihood | Relapse | (2.5,3.5] |
| out-of-sample | 406 | 398.8625403 | Negative log-likelihood | Relapse | (3.5,4.5] |
| out-of-sample | 167 | 205.0234432 | Negative log-likelihood | Relapse | (4.5,5.5] |
| out-of-sample | 259 | 339.0155422 | Negative log-likelihood | Relapse | (5.5,Inf] |

The model performance measured by C-index, MSE and negative log-likelihood is shown for out-of-sample predictions of the predictive CDP and relapse models, and it is based on 10-fold cross-validation. The integer in the 'n' column refers either to number of observations (MSE, Negative log-likelihood) or the number of matched pairs in that time interval (C-Index). Therapy cycles are grouped according to their observation time, as can be seen in the 'Observation time' column.
