# Supplementary material for: Framework for personalized prediction of treatment response in relapsing remitting multiple sclerosis
Source: PubMed Central journal article supplement (PMC7006411; doi:10.1186/s12874-020-0906-6), 2020-02-07
Supplement: 12874_2020_906_MOESM8_ESM.pdf [file 12874_2020_906_MOESM8_ESM.pdf]

## Additional file 8: Comparison of predicted treatment effectiveness

**Table S8.1:** Sample sizes for highest ranked therapy

| Clinical Outcome | Number of Relapses         |                                 | Occurrence of CDP      |                            |
|------------------|----------------------------|---------------------------------|------------------------|----------------------------|
|                  | Sample Size for DMT* Taken | Sample Size when DMT* Not Taken | Sample Size DMT* Taken | Sample Size DMT* Not Taken |
| DMT*             |                            |                                 |                        |                            |
| Dimethylfumarat  | 134                        | 307                             | 863                    | 306                        |
| Fingolimod       | 128                        | 112                             | 87                     | 135                        |
| Glatirameracetat | -                          | 1                               | 45                     | 238                        |
| IF-beta1         | 2                          | 6                               | 3                      | 14                         |
| Natalizumab      | 234                        | 2182                            | 132                    | 1101                       |
| Teriflunomide    | -                          | 13                              | 16                     | 179                        |

The number of patients for each highest ranked therapy (DMT\*) is listed based on their adherence. Sample sizes are listed based on the mean posterior number of relapses, and based on the mean posterior occurrence of a CDP.

**Table S8.2:** Survey-weighted GLM for the predictive relapse model

| GLM model outputs (svyglm.nb) |              |        |         |
|-------------------------------|--------------|--------|---------|
|                               | Coefficients | SE     | p-value |
| Dimethylfumarat: intercept    | -1.0705      | 0.1385 | <0.001  |
| Dimethylfumarat: slope        | -0.6918      | 0.2892 | 0.0167  |
| Fingolimod: intercept         | -0.8143      | 0.1711 | <0.001  |
| Fingolimod: slope             | 0.0423       | 0.24   | 0.86    |
| Natalizumab: intercept        | -0.7421      | 0.0418 | <0.001  |
| Natalizumab: slope            | -0.4376      | 0.1873 | 0.0195  |

SE: Standard error of the coefficients. Model outputs of the survey-weighted negative binomial GLM svyglm.nb, applied to the observed number of relapses. The survey-weighted GLM was fitted to each therapy in turn. Group membership (subject who received the therapy ranked highest by the predictive model and those who received another therapy) was encoded by an indicator variable and derived from the predictive relapse model.

**Table S8.3:** Survey-weighted GLM for the predictive CDP model

| GLM model outputs (svyglm)  |              |          |             |
|-----------------------------|--------------|----------|-------------|
|                             | Coefficients | SE       | p-value     |
| Dimethylfumarat: intercept  | -2.36254     | 0.09642  | 4.18E-107   |
| Dimethylfumarat: slope      | -0.53629     | 0.243424 | 0.027783622 |
| Fingolimod: intercept       | -2.59057     | 0.290462 | 2.34E-16    |
| Fingolimod: slope           | 0.111356     | 0.422328 | 0.792290399 |
| Glatirameracetat: intercept | -2.24036     | 0.174009 | 4.15E-30    |
| Glatirameracetat: slope     | -0.53358     | 0.569995 | 0.3500183   |
| Natalizumab: intercept      | -2.27615     | 0.083491 | 9.42E-129   |
| Natalizumab: slope          | -0.40208     | 0.482948 | 0.405249923 |
| Teriflunomide: intercept    | -2.37646     | 0.223784 | 3.24E-21    |
| Teriflunomide: slope        | -0.4317      | 1.249648 | 0.730108299 |

SE: Standard error of the coefficients. Model outputs of the survey-weighted quasi-binomial GLM svyglm, applied to the observed occurrences of CDP. The survey-weighted GLM was fitted to each therapy in turn. Group membership (subject who received the therapy ranked highest by the predictive model and those who did not) was encoded by an indicator variable and derived from the predictive CDP model.
